# Supplementary material
Source: ML conference proceedings conference paper supplement (https://proceedings.neurips.cc/paper_files/paper/2020/hash/78f7d96ea21ccae89a7b581295f34135-Abstract.html)
Supplement: Supplementary file [file 78f7d96ea21ccae89a7b581295f34135-Supplemental.pdf]

## A Supplementary Material

### A.1 Frequency Multipliers - Proofs

We skip the proof of Lemma 1 since it is elementary. We give a proof of Lemma 2 as follows.

*Proof of Lemma 2.*  $T_k(t; \alpha, \beta)$  has  $4k$  straight line segments which either increase from 0 to  $\alpha\beta = 2al$  or decrease from  $\alpha\beta$  to 0. For each of these line segments, the entire set of values of  $T_l(\cdot; a, b)$  in  $[0, 2al]$  is repeated once. This gives us  $4kl$  triangles. The height of these triangles is the same as that of  $T_l(\cdot; a, b)$  which is  $ab$ . The domain of the triangle waveform is the same as that of  $T_k(\cdot; \alpha, \beta)$ , which is  $[-2k\alpha, 2k\alpha]$ . From this we conclude the statement of the lemma.  $\square$

### A.2 ReLU Representation for Sinusoids - Proofs

Let  $\omega > 0$ . We want to represent  $t \rightarrow \sin(\omega t)$  for  $t \in [0, \pi/\omega]$  in terms of ReLU functions. The first part of the argument entails manipulation of an integral, and then the resulting identity will be applied to obtain the proofs of Lemmas 3 and 4.

To start, integration by parts yields

$$\int_0^{\pi/\omega} \omega^2 \sin(\omega T) \text{ReLU}(t - T) dT = \omega t - \sin(\omega t).$$

Replacing  $t$  with  $\pi/\omega - t$ , we have

$$\int_0^{\pi/\omega} \omega^2 \sin(\omega T) \text{ReLU}(\pi/\omega - t - T) dT = \pi - \omega t - \sin(\omega t),$$

and adding the last two equations gives

$$\int_0^{\pi/\omega} \omega^2 \sin(\omega T) [\text{ReLU}(\pi/\omega - t - T) + \text{ReLU}(t - T)] dT = \pi - 2\sin(\omega t).$$

From the case  $t = 0$  in the last equation, we conclude that

$$\pi = \int_0^{\pi/\omega} \omega^2 \sin(\omega T) [\pi/\omega - T] dT.$$

Combining the last two equations, we obtain the identity

$$\sin(\omega t) = \frac{1}{2} \int_0^{\pi/\omega} \omega^2 \sin(\omega T) [\pi/\omega - T - \text{ReLU}(\pi/\omega - t - T) - \text{ReLU}(t - T)] dT.$$

Making the transformation  $S = \frac{T\omega}{\pi}$ , the integral can be rewritten as

$$\sin(\omega t) = \frac{\pi}{2} \int_0^1 \omega \sin(\pi S) \left[ \frac{\pi}{\omega}(1 - S) - \text{ReLU}\left(\frac{\pi}{\omega}(1 - S) - t\right) - \text{ReLU}\left(t - \frac{\pi S}{\omega}\right) \right] dS. \quad (12)$$

Now recall the function  $R_4(\cdot; S, \omega)$  as defined in Section 5.2. A simple calculation shows that

$$R_4(t; S, \omega) = \begin{cases} 0 & \text{if } t \notin [0, \frac{\pi}{\omega}] \\ \frac{\pi}{\omega}(1 - S) - \text{ReLU}\left(\frac{\pi}{\omega}(1 - S) - t\right) - \text{ReLU}\left(t - \frac{\pi S}{\omega}\right) & \text{if } t \in [0, \frac{\pi}{\omega}], \end{cases}$$

so if we let  $S$  be a random variable with  $S \sim \text{Unif}([0, 1])$  we can rewrite (12) as

$$\mathbb{E} \frac{\pi\omega}{2} \sin(\pi S) R_4(t; S, \omega) = \begin{cases} 0 & \text{if } t \notin [0, \frac{\pi}{\omega}] \\ \sin(\omega t) & \text{if } t \in [0, \frac{\pi}{\omega}]. \end{cases}$$

It then follows that

$$\mathbb{E} \frac{\pi\omega}{2} \sin(\pi S) [R_4(t; S, \omega) - R_4(t - \frac{\pi}{\omega}; S, \omega)] = \begin{cases} 0 & \text{if } t \notin [0, \frac{\pi}{\omega}] \\ \sin(\omega t) & \text{if } t \in [0, \frac{2\pi}{\omega}]. \end{cases} \quad (13)$$

*Proof of Lemma 3.* The first item follows from the basic trigonometric identity  $\cos(x) = \sin(x + \frac{\pi}{2})$  and Equation (13).

For Item 2, note that because  $\Gamma_n^{\cos}(\cdot; S, \omega)$  is a sum of shifted versions of  $\Gamma^{\sin}(\cdot; S, \omega)$  such that the interiors of the shifted versions' supports are all disjoint, it is sufficient to upper bound the values of  $\Gamma^{\sin}(\cdot; S, \omega)$ . Indeed, inspection of the form of  $R_4$  shows that  $|R_4(t; S, \omega)| \leq \frac{\pi}{\omega} \min(S, 1-S) \leq \frac{\pi}{2\omega}$ . Since  $\frac{\pi\omega}{2} |\sin(\pi S)| \leq \frac{\pi\omega}{2}$ , the bound follows.

Finally, Item 3 follows because  $\Gamma_n^{\cos}(\cdot; S, \omega)$  is implemented via summation of  $4(n+1)$  shifted versions of the function  $R_4(\cdot; S, \omega)$ . Since  $R_4(\cdot; S, \omega)$  by definition can be implemented via 4 ReLU functions, we conclude the result.  $\square$

*Proof of Lemma 4.* It is sufficient to show that for  $t \in [-r - \frac{\pi}{\beta\omega}, r + \frac{\pi}{\beta\omega}]$

$$\mathbb{E}\Gamma_n^{\cos}(T_k(t; \alpha, \beta); S, \omega) = \cos(\beta\omega t).$$

Fix  $t \in [-r - \frac{\pi}{\beta\omega}, r + \frac{\pi}{\beta\omega}]$ . By definition,  $T_k(\cdot; \alpha, \beta)$  is supported in  $[-2k\alpha, 2k\alpha]$ . By our choice of  $k$ , we have  $[-r - \frac{\pi}{\beta\omega}, r + \frac{\pi}{\beta\omega}] \subseteq [-2k\alpha, 2k\alpha]$ . Let  $t \in [2m\alpha, 2(m+1)\alpha]$  for some  $m \in \mathbb{Z}$  such that  $-k \leq m \leq k-1$ . We invoke Item 1 of Lemma 1 to show that  $T_k(t; \alpha, \beta) = T(t - 2m\alpha; \alpha, \beta)$ . Now,  $T(t - 2m\alpha, \alpha, \beta) \in [0, \alpha\beta] = [0, \frac{(2n+1)\pi}{\omega}]$ . Therefore by Item 1 of Lemma 3,

$$\mathbb{E}\Gamma_n^{\cos}(T_k(t; \alpha, \beta); S, \omega) = \cos(\omega T(t - 2m\alpha; \alpha, \beta)). \quad (14)$$

It is now sufficient to show that  $\cos(\omega T(t - 2m\alpha; \alpha, \beta)) = \cos(\beta\omega t)$ . We consider two cases:

1) If  $t - 2m\alpha \in [0, \alpha]$ , then  $T(t - 2m\alpha; \alpha, \beta) = \beta t - 2m\alpha\beta$ . The LHS of Equation (14) becomes

$$\cos(\omega\beta t - 2m\alpha\beta\omega) = \cos(\omega\beta t - 2m(2n+1)\pi) = \cos(\omega\beta t).$$

2) If  $t - 2m\alpha \in (\alpha, 2\alpha]$ , then  $T(t - 2m\alpha; \alpha, \beta) = (2m+2)\alpha\beta - \beta t$  and hence the LHS of Equation (14) becomes

$$\cos(-\omega\beta t + (2m+2)\alpha\beta\omega) = \cos(-\omega\beta t + (2m+2)(2n+1)\pi) = \cos(\omega\beta t).$$

This completes the proof.  $\square$

## B Uniform Continuity

We will give a sketch of the proof that any  $f \in \mathcal{G}_K$  is uniformly continuous. By definition, there exists a finite complex measure  $\mu$  over  $\mathbb{R}^d$  such that  $f(x) = \int \exp(i\langle \xi, x \rangle) \mu(d\xi)$  for every  $x \in \mathbb{R}^d$ . Applying Hahn-Jordan decomposition theorem and Radon-Nikodym theorem, we conclude that  $\mu(d\xi) = \exp(i\theta(\xi)) |\mu|(d\xi)$  for some finite measure  $|\mu|$  called the total variation measure of  $\mu$ . Therefore, for arbitrary  $x, y \in \mathbb{R}^d$  with  $x - y = \delta$ .

$$\begin{aligned} |f(x) - f(y)| &= \left| \int (\exp(i\langle \xi, x \rangle) - \exp(i\langle \xi, y \rangle)) \mu(d\xi) \right| \\ &= \left| \int (\exp(i\langle \xi, x \rangle) - \exp(i\langle \xi, y \rangle)) \exp(i\theta(\xi)) |\mu|(d\xi) \right| \\ &\leq \int |\exp(i\langle \xi, x \rangle) - \exp(i\langle \xi, y \rangle)| |\mu|(d\xi) \\ &= \int |\exp(i\langle \xi, \delta \rangle) - 1| |\mu|(d\xi) \\ &\leq \int 2 \min(1, |\langle \xi, \delta \rangle|) |\mu|(d\xi) \\ &\leq \int 2 \min(1, \|\xi\| \|\delta\|) |\mu|(d\xi) \\ &:= I(\|\delta\|) \end{aligned} \quad (15)$$

By dominated convergence theorem, we conclude that  $\lim_{\|\delta\| \rightarrow 0} I(\|\delta\|) = 0$ . Since  $I(\|\delta\|)$  depends only on  $\|x - y\|$  and not on  $x, y$ , we conclude that  $f$  is uniformly continuous.
